# Supplementary material
Source: Springer Nature journal article supplement (https://publikationen.ub.uni-frankfurt.de/opus4/files/35269/13104_2014_3224_MOESM3_ESM.pdf)
Supplement: MOESM3 [file 13104_2014_3224_MOESM3_ESM.pdf]

**Suppl. Table 2A.** Influence of PLX4032, PLX4720, or the ABCC1 inhibitor MK571 on the concentration of the ABCC1 substrate vincristine that decreases the viability of ABCC1-expressing G62 cells by 50% (IC<sub>50</sub>).

|                     | cell viability in the absence of vincristine (%) | IC <sub>50</sub> vincristine (ng/mL) | fold sensitisation relative to vincristine alone |
|---------------------|--------------------------------------------------|--------------------------------------|--------------------------------------------------|
| <b>PLX4032 (μM)</b> |                                                  |                                      |                                                  |
| 0                   | 100.00 ± 0.00                                    | 2.24 ± 0.31                          | 1.00                                             |
| 0.625               | 99.81 ± 16.78                                    | 2.13 ± 0.22                          | 1.05                                             |
| 1.25                | 104.91 ± 11.93                                   | 2.01 ± 0.07                          | 1.11                                             |
| 2.5                 | 95.04 ± 13.73                                    | 1.78 ± 0.20                          | 1.26                                             |
| 5                   | 96.44 ± 7.48                                     | 1.23 ± 0.14*                         | 1.82                                             |
| 10                  | 92.36 ± 9.95                                     | 0.72 ± 0.09*                         | 3.11                                             |
| 20                  | 85.12 ± 14.52                                    | 0.55 ± 0.16*                         | 4.07                                             |
| MK571 10μM          | 96.79 ± 10.17                                    | 0.39 ± 0.13*                         | 5.74                                             |
| <b>PLX4720 (μM)</b> |                                                  |                                      |                                                  |
| 0                   | 100.00 ± 0.00                                    | 2.18 ± 0.24                          | 1.00                                             |
| 0.625               | 100.84 ± 18.81                                   | 2.19 ± 0.27                          | 1.00                                             |
| 1.25                | 92.10 ± 10.75                                    | 1.97 ± 0.12                          | 1.11                                             |
| 2.5                 | 93.59 ± 12.28                                    | 1.64 ± 0.29                          | 1.33                                             |
| 5                   | 87.33 ± 13.18                                    | 1.43 ± 0.30*                         | 1.52                                             |
| 10                  | 73.91 ± 12.01                                    | 0.75 ± 0.15*                         | 2.91                                             |
| 20                  | 60.53 ± 9.19                                     | 0.53 ± 0.15*                         | 4.11                                             |
| MK571 10μM          | 95.38 ± 12.35                                    | 0.37 ± 0.11*                         | 5.89                                             |

\* p < 0.05 relative to vincristine alone

**Suppl. Table 2B.** Influence of PLX4032 or the ABCC1 inhibitor MK571 on the concentration of the ABCC1 substrate vincristine that decreases the viability of ABCC1-expressing PC3<sup>rVCR</sup><sup>20</sup> cells by 50% (IC<sub>50</sub>).

| PLX4032 (μM) | cell viability in the absence of vincristine (%) | IC <sub>50</sub> vincristine (ng/mL) | fold sensitisation relative to vincristine alone |
|--------------|--------------------------------------------------|--------------------------------------|--------------------------------------------------|
| 0            | 100.00 ± 0.00                                    | 39.95 ± 3.47                         | 1.00                                             |
| 0.625        | 93.84 ± 12.04                                    | 35.09 ± 6.39                         | 1.14                                             |
| 1.25         | 95.05 ± 9.57                                     | 32.33 ± 4.91                         | 1.24                                             |
| 2.5          | 96.15 ± 10.35                                    | 29.70 ± 4.88                         | 1.35                                             |
| 5            | 84.06 ± 4.16                                     | 17.36 ± 2.23*                        | 2.30                                             |
| 10           | 88.24 ± 2.41                                     | 12.22 ± 1.74*                        | 3.27                                             |
| 20           | 81.93 ± 2.46                                     | 9.29 ± 1.33*                         | 4.30                                             |
| MK571 (μM)   |                                                  |                                      |                                                  |
| 10           | 109.38 ± 16.31                                   | 11.87 ± 2.67*                        | 3.37                                             |

\* p < 0.05 relative to vincristine alone

**Suppl. Table 2C.** Influence of PLX4720 or the ABCC1 inhibitor MK571 on the concentration of the ABCC1 substrate vincristine that decreases the viability of ABCC1-expressing PC3<sup>rVCR</sup><sup>20</sup> cells by 50% (IC<sub>50</sub>).

| PLX4720 (μM) | cell viability in the absence of vincristine (%) | IC <sub>50</sub> vincristine (ng/mL) | fold sensitisation relative to vincristine alone |
|--------------|--------------------------------------------------|--------------------------------------|--------------------------------------------------|
| 0            | 100.00 ± 0.00                                    | 37.29 ± 3.08                         | 1.00                                             |
| 0.625        | 99.61 ± 10.44                                    | 35.30 ± 4.99                         | 1.06                                             |
| 1.25         | 96.37 ± 8.83                                     | 37.55 ± 2.41                         | 0.99                                             |
| 2.5          | 94.90 ± 8.83                                     | 27.67 ± 5.13                         | 1.35                                             |
| 5            | 97.74 ± 11.32                                    | 13.84 ± 2.32*                        | 2.69                                             |
| 10           | 88.35 ± 15.56                                    | 11.15 ± 1.93*                        | 3.34                                             |
| 20           | 72.85 ± 10.06                                    | 9.40 ± 1.08*                         | 3.97                                             |
| MK571 (μM)   |                                                  |                                      |                                                  |
| 10           | 114.96 ± 10.37                                   | 11.57 ± 1.88*                        | 3.22                                             |

\* p < 0.05 relative to vincristine alone
